# Supplementary material for: Antioxidant Role and Cardiolipin Remodeling by Redox-Activated Mitochondrial Ca2+-Independent Phospholipase A2γ in the Brain
Source: MDPI journal article supplement (doi:10.3390/antiox11020198), 2022-01-20
Supplement: s1 [file s1]

Supplementary Figures:

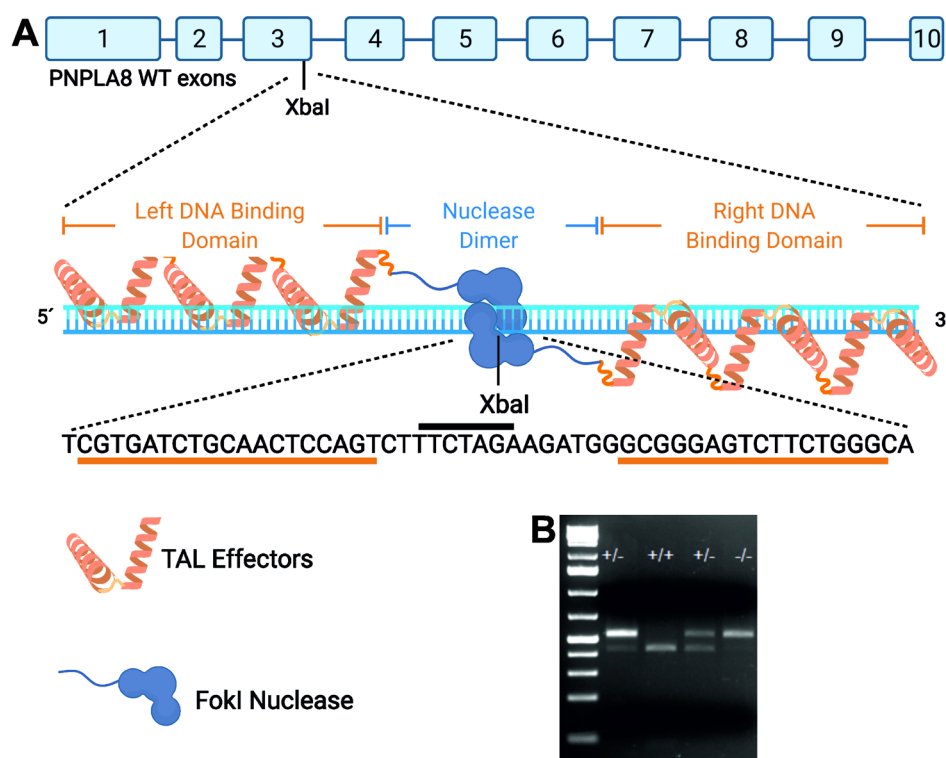

**Figure S1:** Creation of PNPLA8 knock-out mice and the knock-out verification. (A) Schematic representation of knockout mice construction by targeting the PNPLA8 gene, exon 3 by transcription activator-like effector nuclease (TALEN) FokI. The nuclease cleavage leads to deletion of 13 base pairs, including XbaI restriction site and creation of premature stop codon in exon 4. The scheme was created with BioRender.com. (B) Verification of the PNPLA8 knock-out by PCR restriction-fragment-length polymorphism of the genomic DNA purified from mouse tails; +/+ wild type, +/- heterozygote, -/- knock-out.

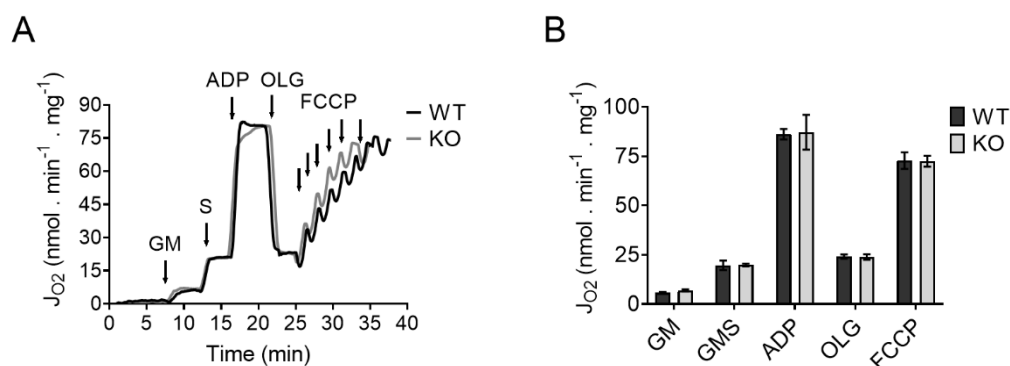

**Figure S2.** Respiratory control analysis of brain mitochondria isolated from iPLA2 $\gamma$ -WT and iPLA2 $\gamma$ -KO mice. (A) Representative traces of respiration rates ( $J_{O_2}$ ) evolving in time. (B) The effects of various reagents on the rates of respiration of brain mitochondria isolated from iPLA2 $\gamma$ -WT (black bars) or iPLA2 $\gamma$ -KO mice (grey bars) monitored by

changes ( $\Delta$ ) in O<sub>2</sub> flux (JO<sub>2</sub>). Reagents and concentrations: GM (glutamate 5 mM, malate 1 mM), S (succinate 5 mM), ADP (1 mM), oligomycin (OLG, 1  $\mu$ M), carbonyl cyanide-4 (trifluoromethoxy) phenylhydrazone (FCCP, 10 nM aliquots).

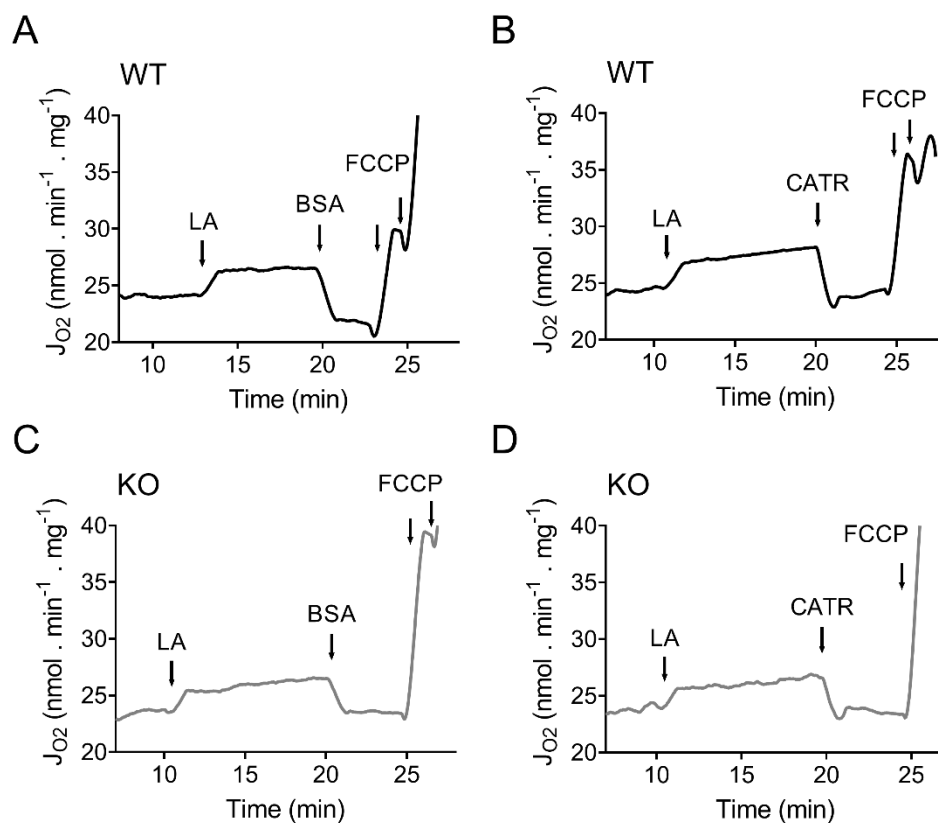

**Figure S3.** Linoleic acid-dependent increase in respiration in brain mitochondria isolated from WT and iPLA2 $\gamma$ -KO mice. Representative traces are shown for state-4 respiration rates (JO<sub>2</sub>) evolving in time in the presence of 5 mM glutamate, 1 mM malate, and 5 mM succinate. The increase in respiration caused by the addition of linoleic acid (LA) was reversed by BSA (A) and CATR (B) in brain mitochondria isolated from WT mice, and identically by BSA and CATR brain mitochondria isolated from iPLA2 $\gamma$ -KO mice.

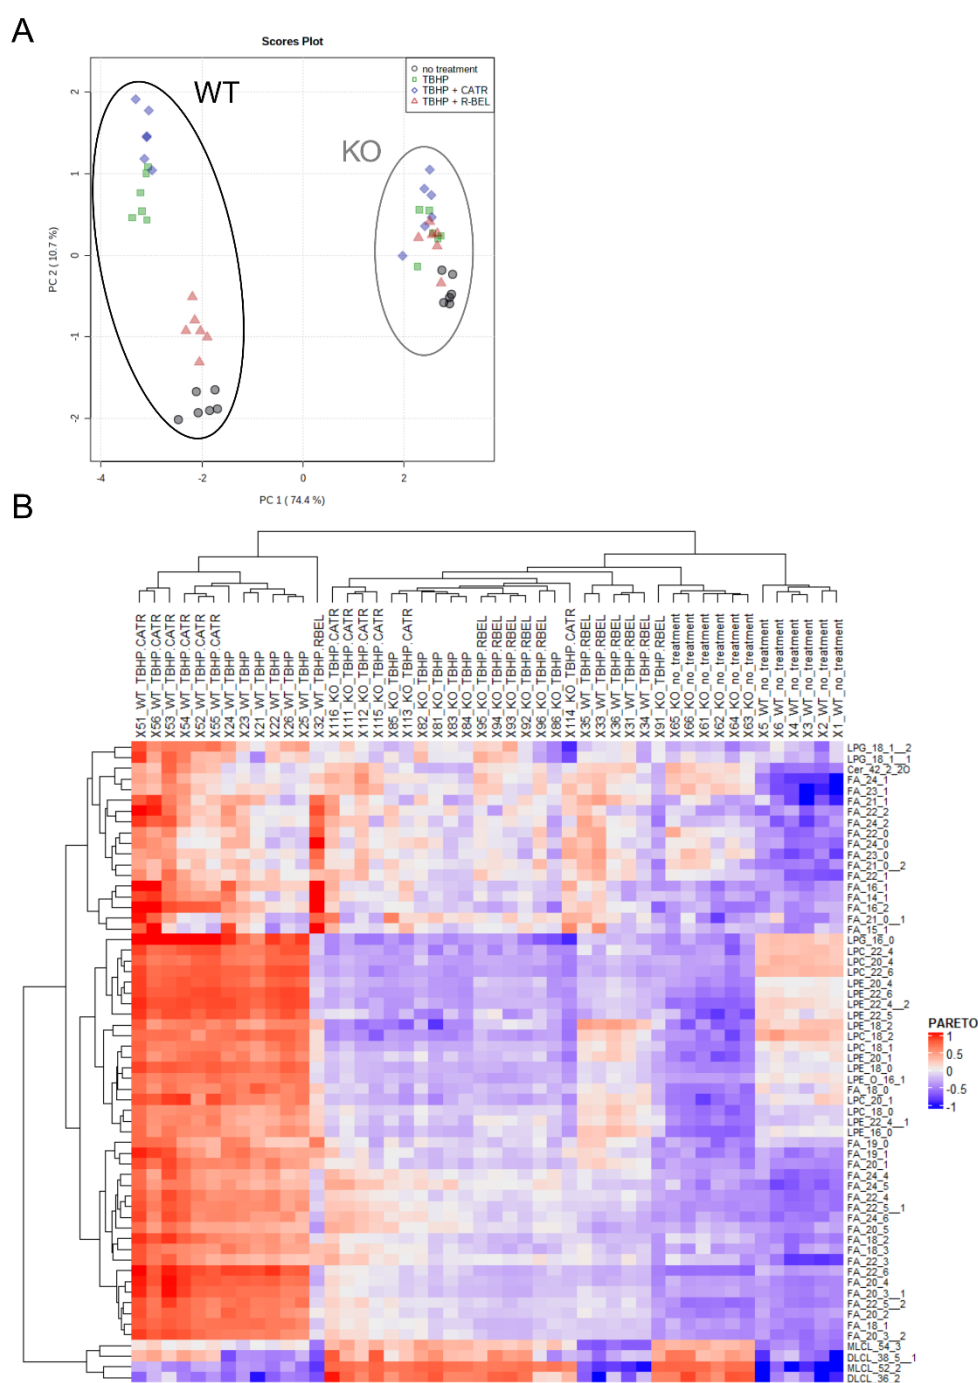

**Figure S4.** Lipidomics analysis of isolated WT and iPLA2 $\gamma$ -KO mouse brain mitochondria. Principal component analysis scores plot (PCA) of TIC-normalized log<sub>10</sub>-transformed intensities for WT and iPLA2 $\gamma$ -KO (A). Lipids with loadings values in PC1 > 0.05 in WT and iPLA2 $\gamma$ -KO mouse brain mitochondria (B). Heatmap based on hierarchical clustering presented in dendrograms according to the Euclidean distance. Data are log<sub>10</sub>-transformed and scaled by Pareto. Isomers are marked with the number after double underscores. Lipidomics data were collected from N = 6 replicates.

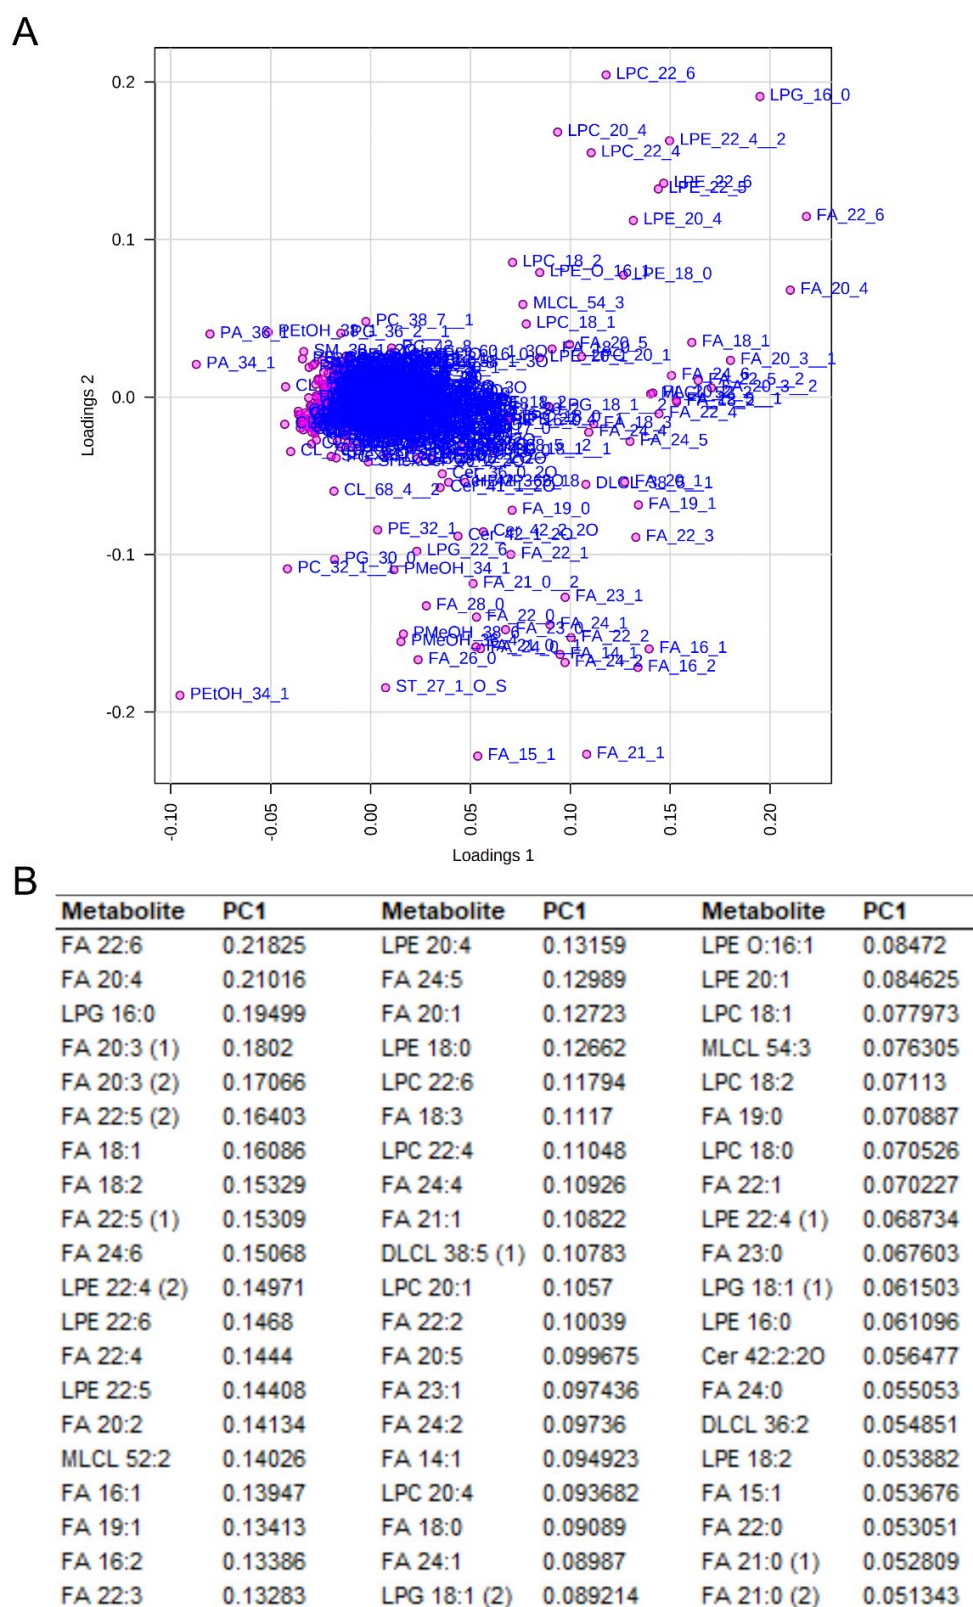

**Figure S5.** Metabolites responsible for sample clustering. PCA loadings plot corresponding to the scores plot in Fig. 3A of brain mitochondria isolated from WT mouse (A). List of metabolites with loadings values in PC1 > 0.05 ordered by descending PC1 (B). Isomers are marked with the number in parentheses.
